# Supplementary material for: Environmental and Economic Assessment of Repairable Carbon-Fiber-Reinforced Polymers in Circular Economy Perspective
Source: MDPI journal article supplement (doi:10.3390/ma15092986), 2022-04-20
Supplement: s1 [file s1]

# Supplementary Materials

# Contents

|                                                         |          |
|---------------------------------------------------------|----------|
| <b>S1. Introduction</b>                                 | <b>3</b> |
| S1.1 Life Cycle Assessment on composites . . . . .      | 3        |
| <b>S2. Results</b>                                      | <b>5</b> |
| S2.1 Normalized LCA results . . . . .                   | 5        |
| S2.2 Normalized LCA results for each scenario . . . . . | 7        |
| <b>Bibliography</b>                                     | <b>7</b> |

# **S1. Introduction**

## **S1.1 Life Cycle Assessment on composites**

Table S1: LCA studies on composites. C-LCA=comparative LCA; A-LCA=Attributional LCA.

| Ref. | Materials                                      | Application   | Type of LCA                 | Impact assessment            | System Boundaries                  | EoL                                                                                                                |
|------|------------------------------------------------|---------------|-----------------------------|------------------------------|------------------------------------|--------------------------------------------------------------------------------------------------------------------|
| [1]  | Steel and CFRP                                 | Automotive    | C-LCA                       | Eco-Indicator 99 aggregation | cradle to grave                    | Incineration                                                                                                       |
| [2]  | Steel and CFRP                                 | Automotive    | C-LCA and life cycle energy | Not clear                    | cradle to grave                    | Thermal recycling                                                                                                  |
| [3]  | CFRP waste                                     | Not specified | C-LCA                       | impact 2002+                 | EoL                                | Pyrolysis, Incineration with energy recovery and landfilling                                                       |
| [4]  | DL-PU panel, ABA-Cotton panel, DL-cotton panel | Automotive    | C-LCA                       | CML 2002                     | cradle to grave                    | Landfill and incineration with energy recovery                                                                     |
| [5]  | Lightweight materials                          | Automotive    | C-LCA                       | CML-IA                       | cradle to grave                    | Incineration, open-loop recycling and closed-loop recycling                                                        |
| [6]  | CFRP                                           | Not specified | A-LCA                       | CML 2000                     | cradle to grave                    | Chemical recycling                                                                                                 |
| [7]  | CFRP waste                                     | Automotive    | C-LCA                       | Not clear                    | EoL                                | Landfill, incineration and mechanical recycling                                                                    |
| [8]  | Composite waste                                | Not specified | C-LCA                       | EPD                          | EoL                                | Chemical and mechanical recycling                                                                                  |
| [9]  | Aluminum alloy and CFRP                        | aviation      | C-LCA                       | Eco-Indicator 99 aggregation | cradle to gate + EoL               | Thermal treatment (pyrolysis)                                                                                      |
| [10] | CFRP waste                                     | Not specified | C-LCA                       | Not clear                    | EoL                                | Landfill, incineration, mechanical recycling, pyrolysis recycling, fluidized bed recycling, and chemical recycling |
| [11] | Biopolymer derived from FDCA                   | Not specified | environmental assessment    | ReCiPe mid-point             | cradle to gate                     | NA                                                                                                                 |
| [12] | Glass fiber composite and hybrid composite     | Automotive    | C-LCA                       | US EPA TRACI2.1              | cradle to grave                    | Landfill                                                                                                           |
| [13] | CFRP waste                                     | Not specified | C-LCA                       | CML-IA; ILCD 2011 midpoint   | EoL + cradle-to-grave (two cycles) | Thermolysis recycling and landfill +incineration                                                                   |
| [14] | Kenaf and glass fiber reinforced cement        | Construction  | C-LCA                       | BEES                         | cradle to grave                    | Landfill                                                                                                           |
| [15] | Polyurethane and rockwool filled composite     | Construction  | C-LCA                       | CML-IA                       | cradle to grave                    | Dismantle of material, reuse, recycling and storage                                                                |
| [16] | Miscanthus carbon based composite              | Automotive    | C-LCA                       | US EPA TRACI2.1              | cradle to grave                    | Landfill                                                                                                           |

## S2. Results

The following section provides additional information on the analyses shown in the main paper. In particular, it provides the normalized LCA results according to the normalization factor by [17].

### S2.1 Normalized LCA results

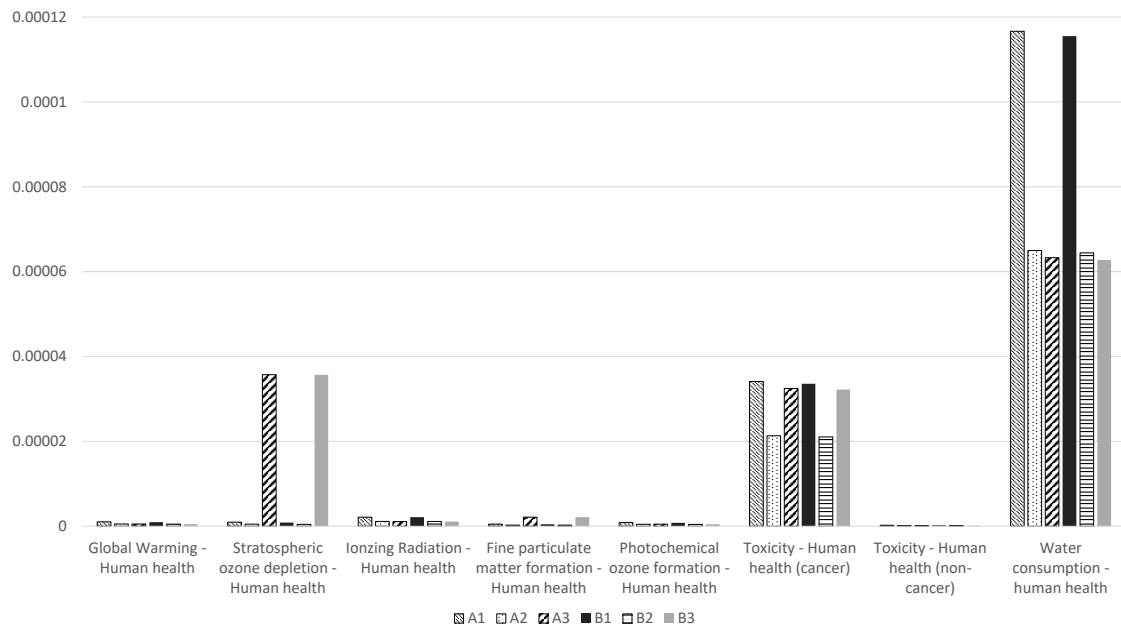

Figure S1: Normalization of LCA results of the six scenarios - human health.

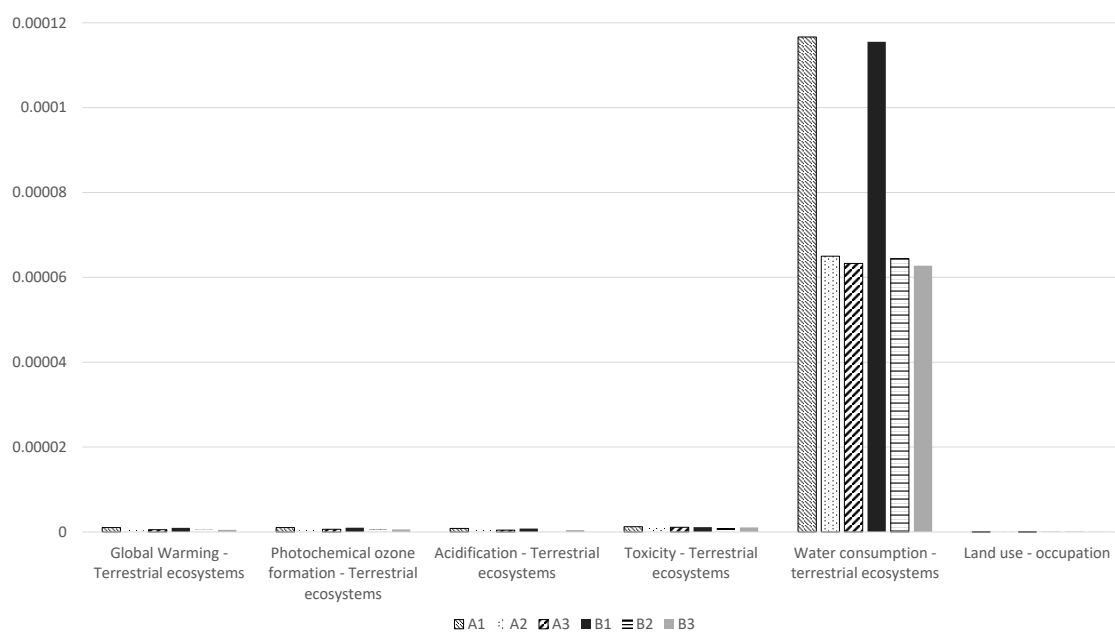

Figure S2: Normalization of LCA results of the six scenarios - terrestrial ecosystem.

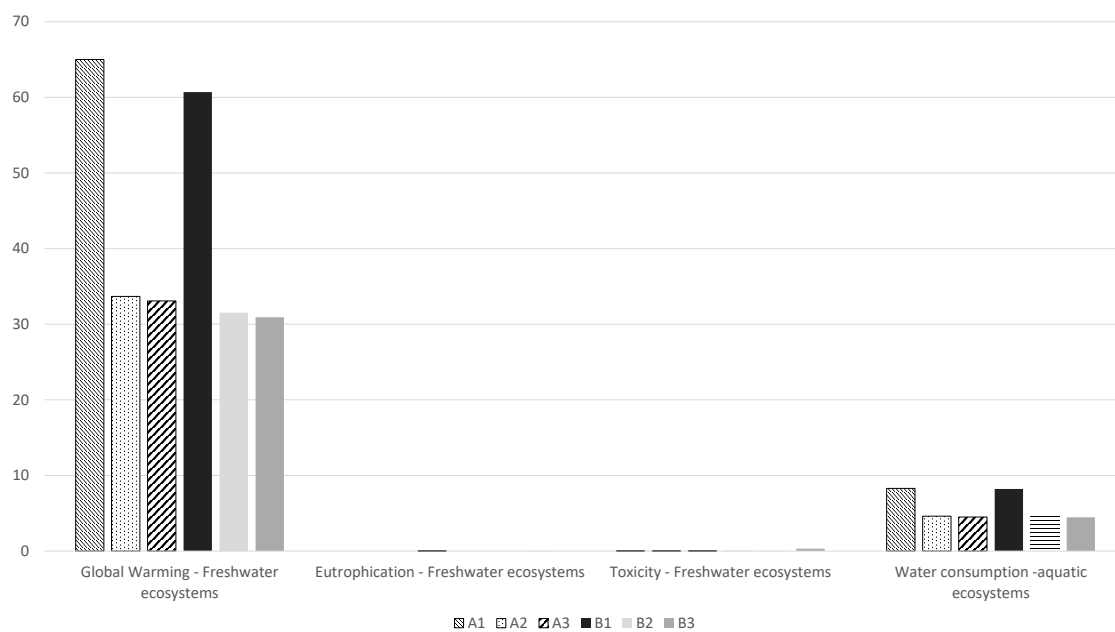

Figure S3: Normalization of LCA results of the six scenarios - freshwater ecosystem.

## S2.2 Normalized LCA results for each scenario

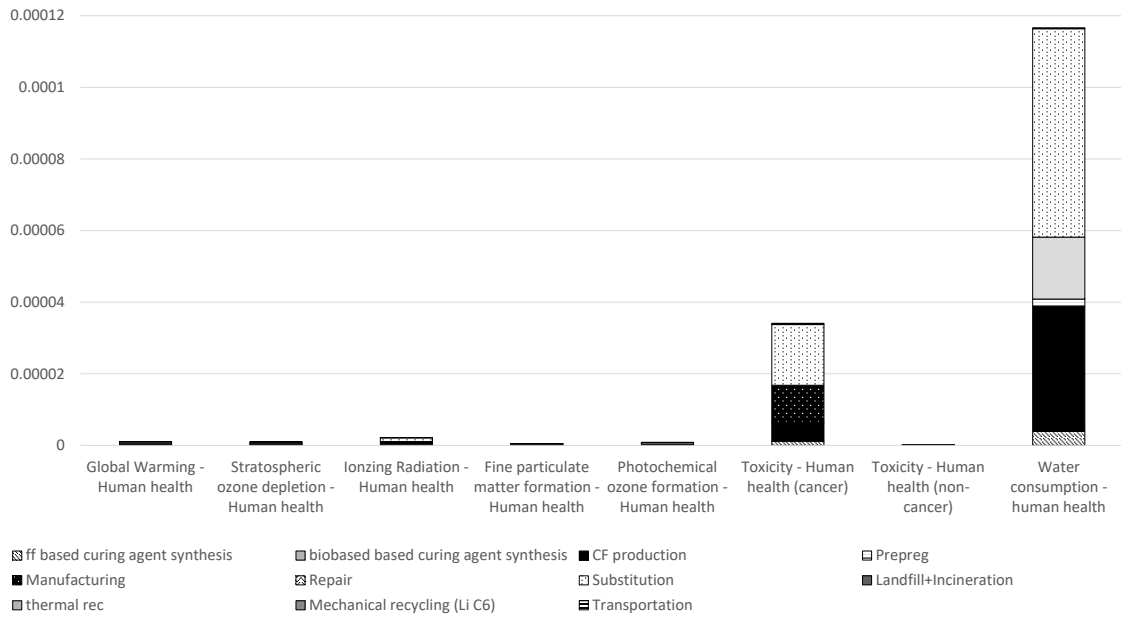

Figure S4: Normalization of LCA results of scenario A1. Water consumption and Toxicity are the two categories with higher environmental impact. CF production, manufacturing and substitution are the steps with highest contribution.

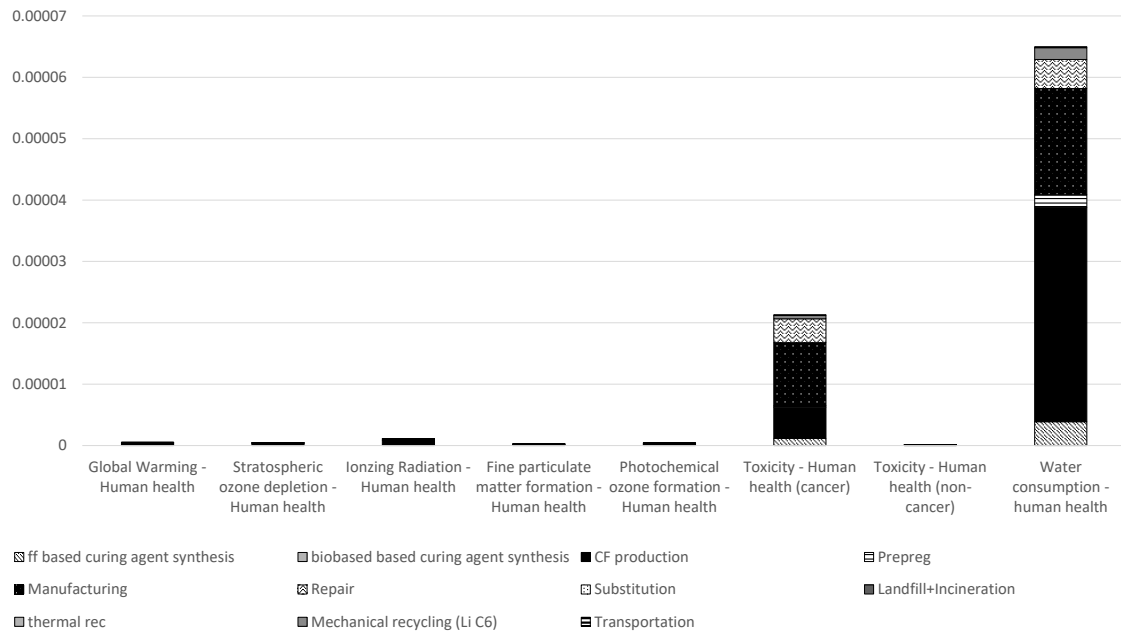

Figure S5: Normalization of LCA results of scenario A2. Water consumption and Toxicity are the two categories with higher environmental impact. CF production and manufacturing are the steps with highest contribution

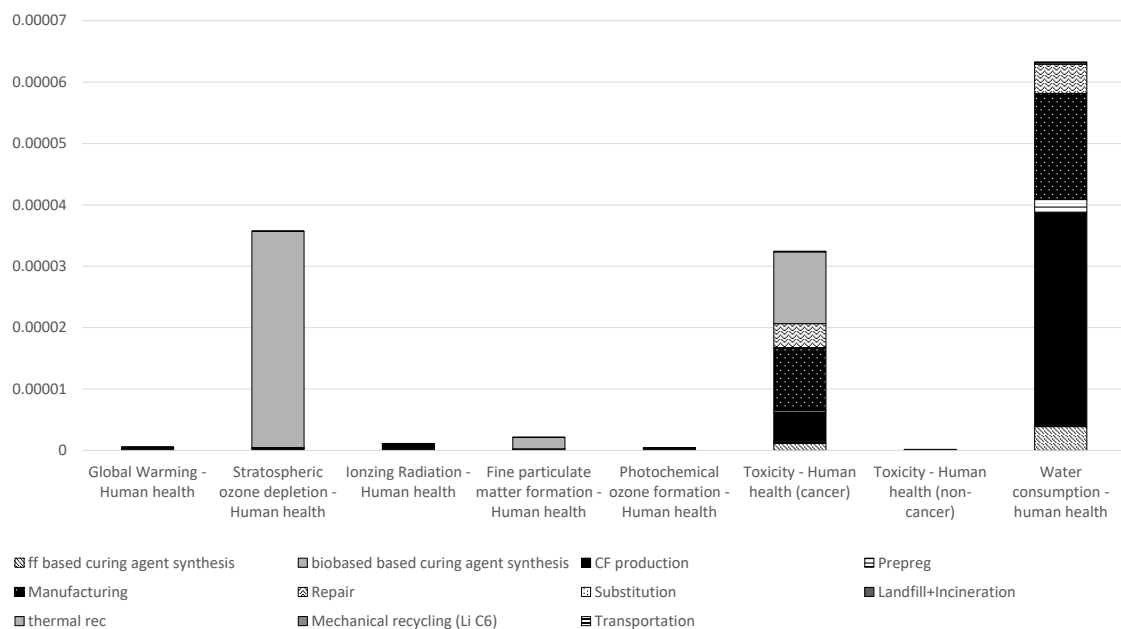

Figure S6: Normalization of LCA results of scenario A3. Stratospheric ozone depletion, Water consumption and Toxicity are the two categories with higher environmental impact. CF production, manufacturing and thermal recycling are the steps with highest contribution



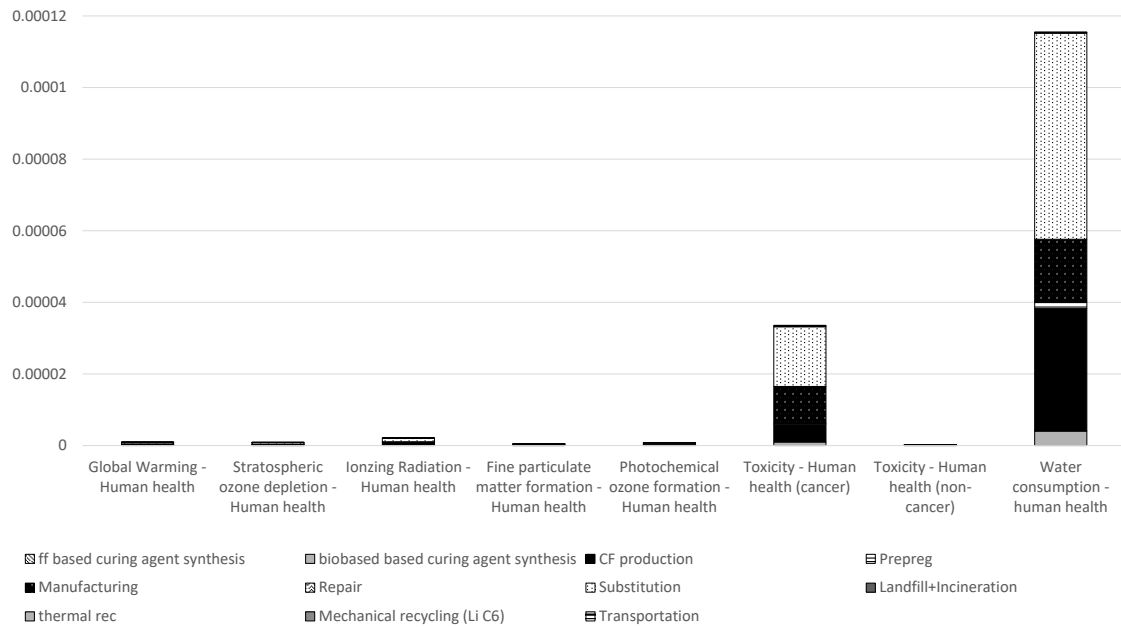

Figure S7: Normalization of LCA results of scenario B1. Water consumption and Toxicity are the two categories with higher environmental impact. CF production, manufacturing and substitution are the steps with highest contribution.

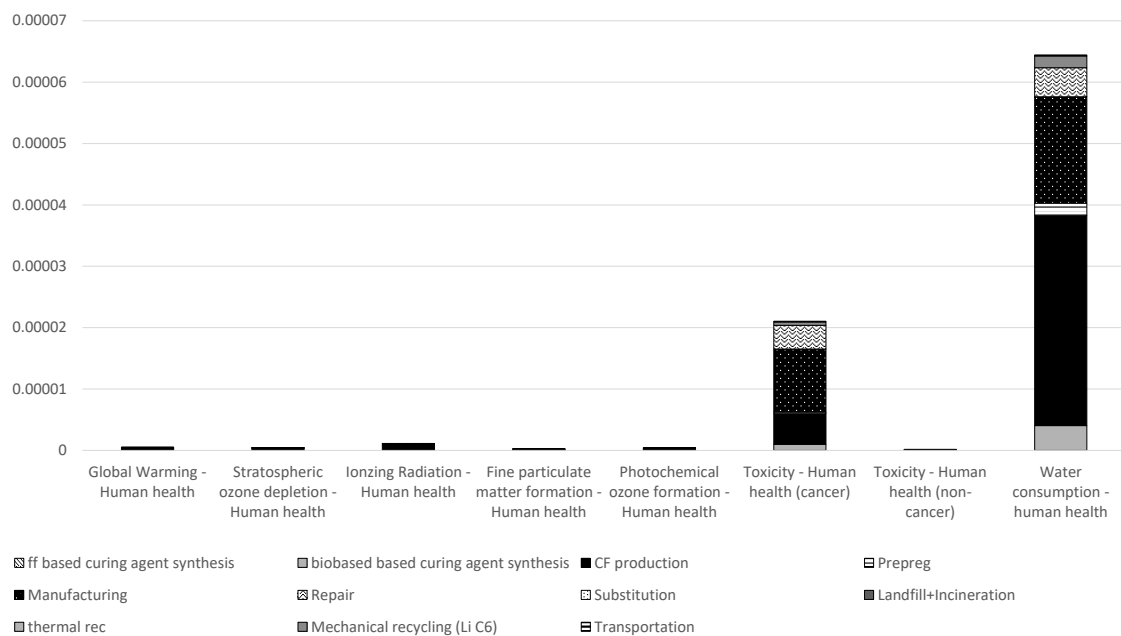

Figure S8: Normalization of LCA results of scenario A2. Water consumption and Toxicity are the two categories with higher environmental impact. CF production and manufacturing are the steps with highest contribution.

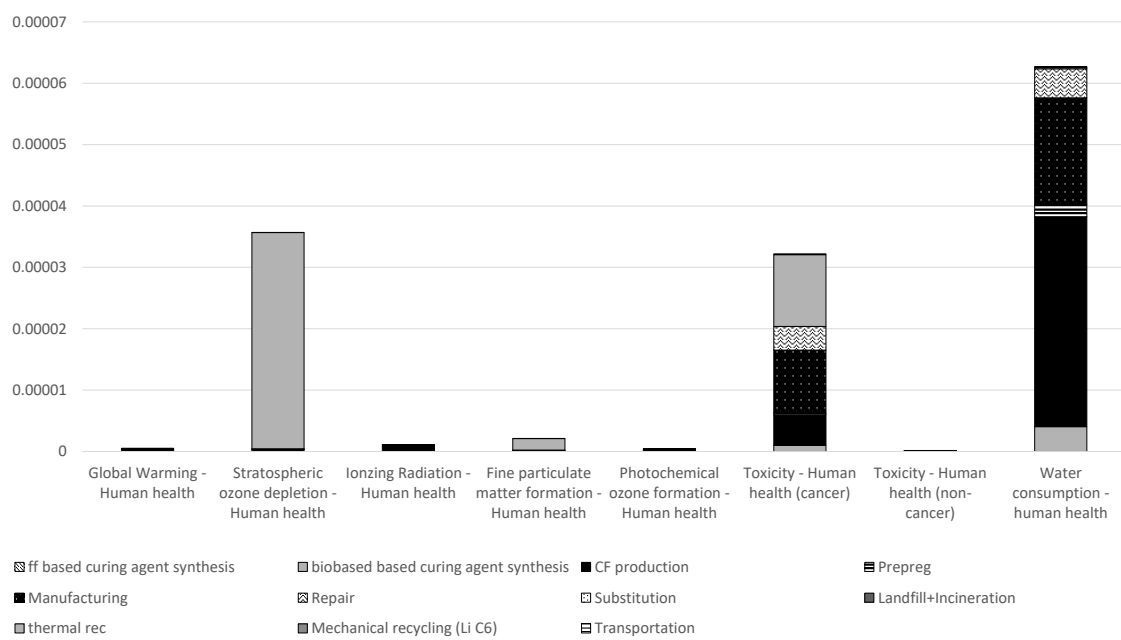

Figure S9: Normalization of LCA results of scenario A3. Stratospheric ozone depletion, Water consumption and Toxicity are the two categories with higher environmental impact. CF production, manufacturing and thermal recycling are the steps with highest contribution

# Bibliography

- [1] J. R. Duflou, J. De Moor, I. Verpoest, and W. Dewulf, “Environmental impact analysis of composite use in car manufacturing,” *CIRP Annals - Manufacturing Technology*, vol. 58, no. 1, pp. 9–12, 2009.
- [2] S. Das, “Life cycle assessment of carbon fiber-reinforced polymer composites,” *International Journal of Life Cycle Assessment*, vol. 16, no. 3, pp. 268–282, 2011.
- [3] R. A. Witik, R. Teuscher, V. Michaud, C. Ludwig, and J. A. E. Månson, “Carbon fibre reinforced composite waste: An environmental assessment of recycling, energy recovery and landfilling,” *Composites Part A: Applied Science and Manufacturing*, vol. 49, pp. 89–99, 2013. [Online]. Available: <http://dx.doi.org/10.1016/j.compositesa.2013.02.009>
- [4] T. D. S. Pegoretti, F. Mathieux, D. Evrard, D. Brissaud, and J. R. D. F. Arruda, “Use of recycled natural fibres in industrial products: A comparative LCA case study on acoustic components in the Brazilian automotive sector,” *Resources, Conservation and Recycling*, vol. 84, pp. 1–14, 2014.
- [5] M. Raugei, D. Morrey, A. Hutchinson, and P. Winfield, “A coherent life cycle assessment of a range of lightweighting strategies for compact vehicles,” *Journal of Cleaner Production*, vol. 108, pp. 1168–1176, 2015.
- [6] A. D. La Rosa, D. R. Banatao, S. J. Pastine, A. Latteri, and G. Cicala, “Recycling treatment of carbon fibre/epoxy composites: Materials recovery and characterization and environmental impacts through life cycle assessment,” *Composites Part B: Engineering*, vol. 104, pp. 17–25, 2016. [Online]. Available: <http://dx.doi.org/10.1016/j.compositesb.2016.08.015>
- [7] X. Li, R. Bai, and J. McKechnie, “Environmental and financial performance of mechanical recycling of carbon fibre reinforced polymers and comparison with conventional disposal routes,” *Journal of Cleaner Production*, vol. 127, no. 2016, pp. 451–460, 2016. [Online]. Available: <http://dx.doi.org/10.1016/j.jclepro.2016.03.139>
- [8] N. A. Shuaib and P. T. Mativenga, “Carbon Footprint Analysis of Fibre Reinforced Composite Recycling Processes,” *Procedia Manufacturing*, vol. 7, pp. 183–190, 2017.

- [9] Y. F. Khalil, “Eco-efficient lightweight carbon-fiber reinforced polymer for environmentally greener commercial aviation industry,” *Sustainable Production and Consumption*, vol. 12, no. May 2016, pp. 16–26, 2017. [Online]. Available: <http://dx.doi.org/10.1016/j.spc.2017.05.004>
- [10] F. Meng, E. A. Olivetti, Y. Zhao, J. C. Chang, S. J. Pickering, and J. McKechnie, “Comparing Life Cycle Energy and Global Warming Potential of Carbon Fiber Composite Recycling Technologies and Waste Management Options,” *ACS Sustainable Chemistry and Engineering*, vol. 6, no. 8, pp. 9854–9865, 2018.
- [11] C. Isola, H. L. Sieverding, R. Raghunathan, M. P. Sibi, D. C. Webster, J. Sivaguru, and J. J. Stone, “Life cycle assessment of photodegradable polymeric material derived from renewable bioresources,” *Journal of Cleaner Production*, vol. 142, pp. 2935–2944, 2017. [Online]. Available: <http://dx.doi.org/10.1016/j.jclepro.2016.10.177>
- [12] M. Akhshik, S. Panthapulakkal, J. Tjong, and M. Sain, “Life cycle assessment and cost analysis of hybrid fiber-reinforced engine beauty cover in comparison with glass fiber-reinforced counterpart,” *Environmental Impact Assessment Review*, vol. 65, no. September 2016, pp. 111–117, 2017. [Online]. Available: <http://dx.doi.org/10.1016/j.eiar.2017.04.005>
- [13] A. O. Nunes, L. R. Viana, P. M. Guineheuc, V. A. da Silva Moris, J. M. F. de Paiva, R. Barna, and Y. Soudais, “Life cycle assessment of a steam thermolysis process to recover carbon fibers from carbon fiber-reinforced polymer waste,” *International Journal of Life Cycle Assessment*, vol. 23, no. 9, pp. 1825–1838, 2018.
- [14] C. Zhou, S. Q. Shi, Z. Chen, L. Cai, and L. Smith, “Comparative environmental life cycle assessment of fiber reinforced cement panel between kenaf and glass fibers,” *Journal of Cleaner Production*, vol. 200, pp. 196–204, 2018. [Online]. Available: <https://doi.org/10.1016/j.jclepro.2018.07.200>
- [15] E. Yilmaz, H. Arslan, and A. Bideci, “Environmental performance analysis of insulated composite facade panels using life cycle assessment (LCA),” *Construction and Building Materials*, vol. 202, pp. 806–813, 2019.
- [16] P. Roy, F. Defersha, A. Rodriguez-Urbe, M. Misra, and A. K. Mohanty, “Evaluation of the life cycle of an automotive component produced from biocomposite,” *Journal of Cleaner Production*, vol. 273, p. 123051, 2020. [Online]. Available: <https://doi.org/10.1016/j.jclepro.2020.123051>
- [17] National Institute for Public Health and Environment and Ministry of Health Welfare and sport, “Normalization scores ReCiPe 2016,” 2020. [Online]. Available: <https://www.rivm.nl/en/documenten/normalization-scores-recipe-2016>

# List of Figures

|    |                                                                                                                                                                                                                                                                                                                      |    |
|----|----------------------------------------------------------------------------------------------------------------------------------------------------------------------------------------------------------------------------------------------------------------------------------------------------------------------|----|
| S1 | Normalization of LCA results of the six scenarios - human health. . . .                                                                                                                                                                                                                                              | 5  |
| S2 | Normalization of LCA results of the six scenarios - terrestrial ecosystem.                                                                                                                                                                                                                                           | 6  |
| S3 | Normalization of LCA results of the six scenarios - freshwater ecosystem.                                                                                                                                                                                                                                            | 6  |
| S4 | Normalization of LCA results of scenario A1. <i>Water consumption</i> and <i>Toxicity</i> are the two categories with higher environmental impact. <i>CF production</i> , <i>manufacturing</i> and <i>substitution</i> are the steps with highest contribution. . . . .                                              | 7  |
| S5 | Normalization of LCA results of scenario A2. <i>Water consumption</i> and <i>Toxicity</i> are the two categories with higher environmental impact. <i>CF production</i> and <i>manufacturing</i> are the steps with highest contribution .                                                                           | 8  |
| S6 | Normalization of LCA results of scenario A3. <i>Stratospheric ozone depletion</i> , <i>Water consumption</i> and <i>Toxicity</i> are the two categories with higher environmental impact. <i>CF production</i> , <i>manufacturing</i> and <i>thermal recycling</i> are the steps with highest contribution . . . . . | 8  |
| S7 | Normalization of LCA results of scenario B1. <i>Water consumption</i> and <i>Toxicity</i> are the two categories with higher environmental impact. <i>CF production</i> , <i>manufacturing</i> and <i>substitution</i> are the steps with highest contribution. . . . .                                              | 9  |
| S8 | Normalization of LCA results of scenario A2. <i>Water consumption</i> and <i>Toxicity</i> are the two categories with higher environmental impact. <i>CF production</i> and <i>manufacturing</i> are the steps with highest contribution .                                                                           | 9  |
| S9 | Normalization of LCA results of scenario A3. <i>Stratospheric ozone depletion</i> , <i>Water consumption</i> and <i>Toxicity</i> are the two categories with higher environmental impact. <i>CF production</i> , <i>manufacturing</i> and <i>thermal recycling</i> are the steps with highest contribution . . . . . | 10 |

# List of Tables

S1 LCA studies on composites. C-LCA=comparative LCA; A-  
LCA=Attributional LCA. . . . . 4
